# Supplementary material
Source: PubMed Central journal article supplement (PMC3497392)
Supplement: AEM.01827-12_zam023123873so2.pdf [file AEM.01827-12_zam023123873so2.pdf]

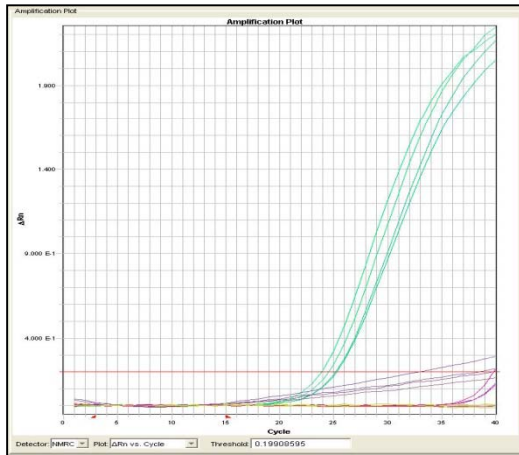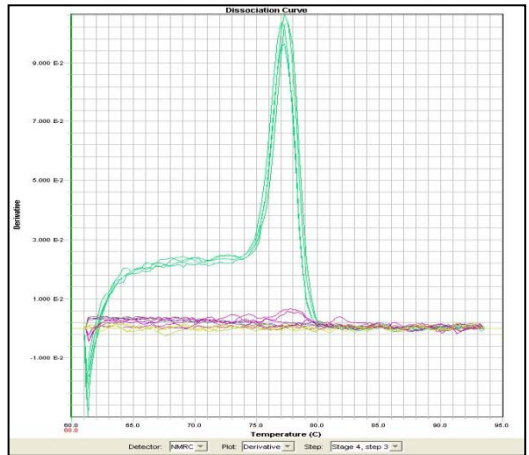

**Figure S1: Real-time PCR (Specific Tag 1) traces of *B. thuringiensis* serovar *kurstaki* BtkB1, *Bordetella pertussis* ATCC 9797 and human placental DNA. Genomic DNA (1 ng) from BtkB1 (green), *B. pertussis* (purple) and human placental DNA (violet) was used as template for real-time PCR assays.**
