# Supplementary material
Source: PubMed Central journal article supplement (PMC3497392)
Supplement: AEM.01827-12_zam999103873so1.pdf [file AEM.01827-12_zam999103873so1.pdf]

**Table S1 – Barcode selection points**

| <b>Feature Description</b>                                         | <b>Number of Features in BMB171 Genome</b> |
|--------------------------------------------------------------------|--------------------------------------------|
| Intergenic Regions > 500 bp                                        | 294                                        |
| with convergently transcribed flanking genes                       | 22                                         |
| with consistent assembly and annotation between BMB171 and T03a001 | 4                                          |
| with no repetitive structure                                       | 3                                          |

**Table S2 – Primer sequences and concentrations used**

| <b>Primer Name</b>    | <b>Sequence</b>                | <b>Final Concentration Used per Reaction</b> |
|-----------------------|--------------------------------|----------------------------------------------|
| Common Tag Forward    | 5'-GGGGTAATGGTAATACGGATAGAT-3' | 80nM                                         |
| Common Tag Reverse    | 5'-TCATAGTATGTAAAGCGTCGGC-3'   | 20nM                                         |
| Specific Tag1 Forward | 5'-GGTAGAGCCACAAACAGC-3'       | 60nM                                         |
| Specific Tag1 Reverse | 5'-TCCAAAAAGAAAAGACACCT-3'     | 60nM                                         |
| Specific Tag2 Forward | 5'-GGTACAAGCAACGATCTCCAGAAT-3' | 80nM                                         |
| Specific Tag2 Reverse | 5'-TGAAGGTTAATTAGCGCATTTGAA-3' | 40nM                                         |
| Target 1 Forward      | 5'-TGCGAAAGAAGAAGAATGGC-3'     | 78.5nM                                       |
| Target 1 Reverse      | 5'-AGAACCAGAGGATGTATTACC-3'    | 83nM                                         |
